# Supplementary material
Source: Royal Society of Chemistry journal article supplement (doi:10.1039/d6bm00380j)
Supplement: d6bm00380j1.pdf [file d6bm00380j1.pdf]

## Supporting information

Coordination driven liquid-to-solid phase transition and self-assembly of DNA-metal condensates

*Songtao Zhou*<sup>1,2,3, #</sup>; *Li Zhang*<sup>4, #</sup>; *Yuxuan Lin*<sup>1, #</sup>; *Min Bao*<sup>1</sup>; *Yongxiu Song*<sup>5</sup>; *Yunlu Dai*<sup>2,3\*</sup>; *Yufeng Pei*<sup>1, \*</sup>; *Jie Song*<sup>1, \*</sup>

<sup>1</sup>Hangzhou Institute of Medicine, Chinese Academy of Sciences, Hangzhou 310022, Zhejiang

<sup>2</sup>Cancer Centre and Institute of Translational Medicine, Faculty of Health Sciences, University of Macau, Macau SAR 999078, China

<sup>3</sup>MoE Frontiers Science Center for Precision Oncology, University of Macau, Macau SAR 999078, China

<sup>4</sup>School of Pharmacy, Changzhou University, Changzhou 213164, China.

<sup>5</sup>Ningbo institute of Dalian University of Technology, Ningbo 315016, China

Correspondence E-mail: [songjie@him.cas.cn](mailto:songjie@him.cas.cn)

## Supplementary figures

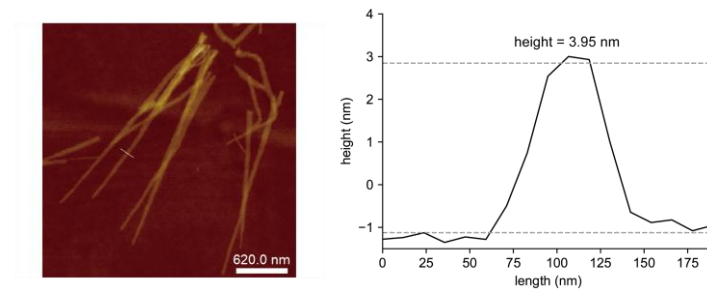

**Supplementary Fig. 1.** Atomic force microscopy (AFM) images of nanoribbon. The height distribution of samples on the white lines in the left panel is analyzed in the right panel. (scale bar = 620 nm)

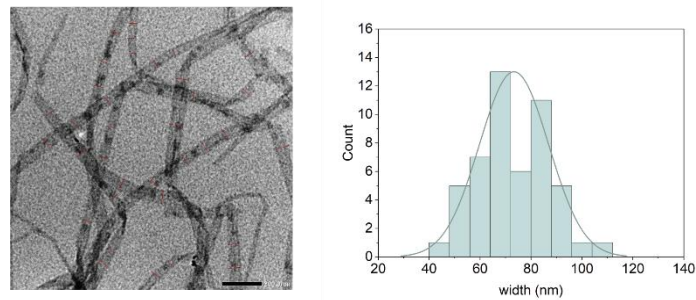

**Supplementary Fig. 2.** The width distribution of nanoribbons analyzed by FIJI. (scale bar: 200nm)

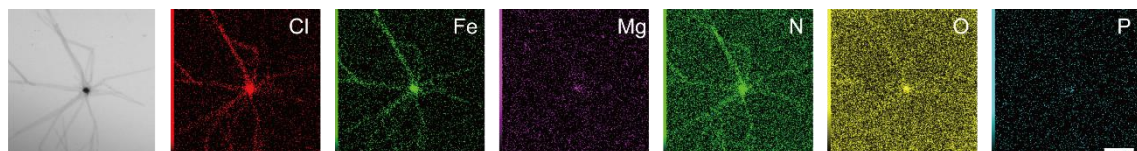

**Supplementary Fig. 3.** Transmission electron microscopy-energy-dispersive spectroscopy (TEM-EDS) images and the elements distribution in nanoribbon. (scale bar: 500 nm)

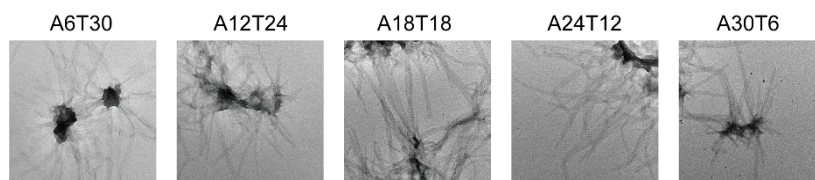

**Supplementary Fig. 4.** The morphology of blocky sequences of poly-A and poly-T. (scale bar: 200nm)

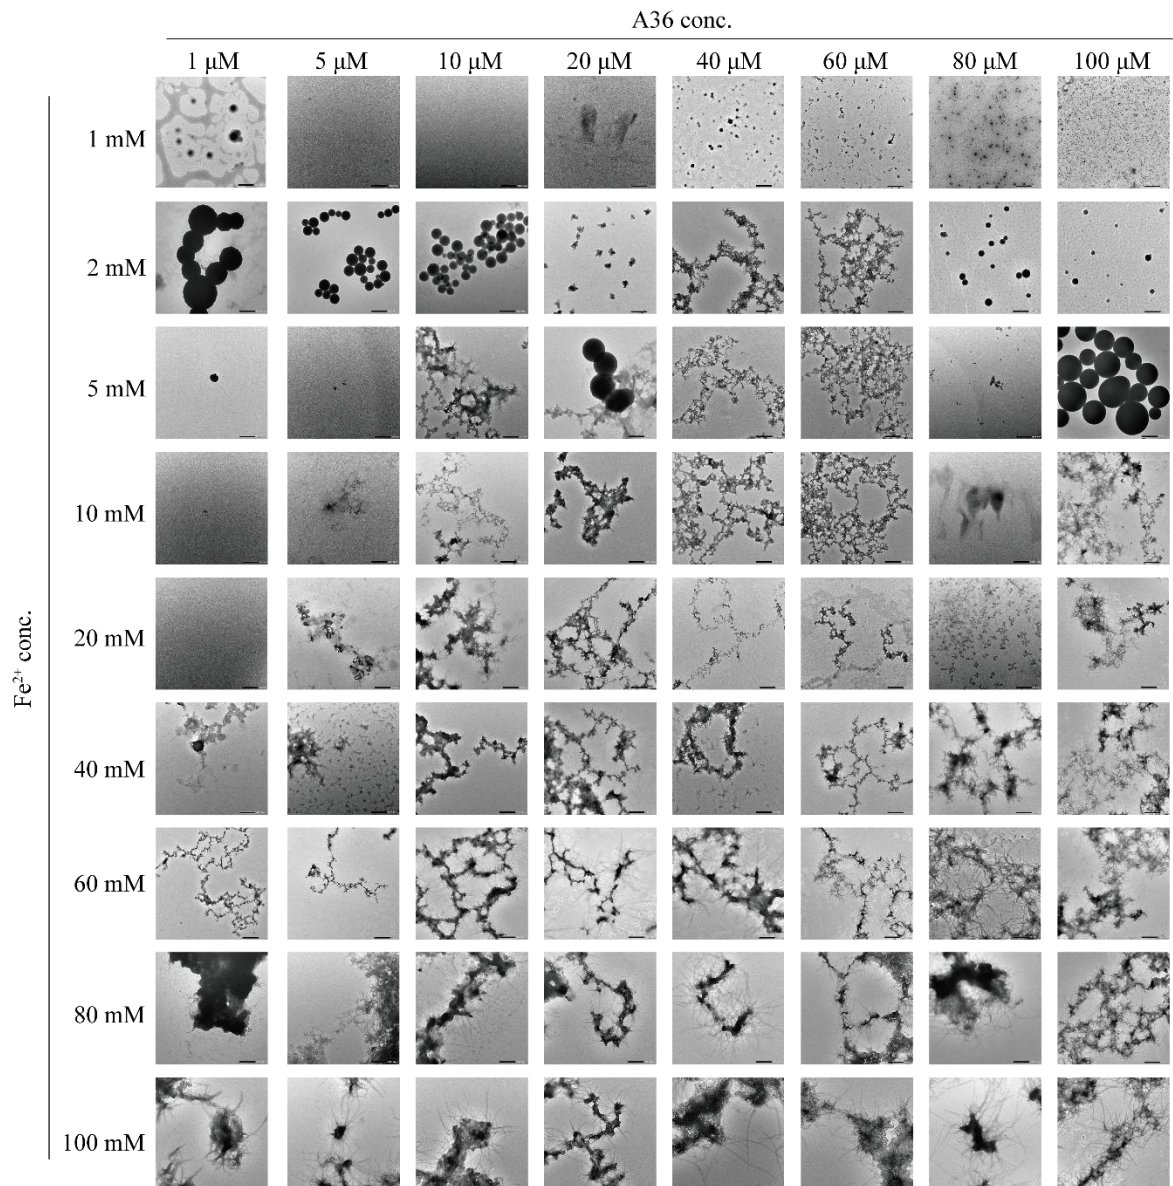

**Supplementary Fig. 5.** The dual concentration matrix of assembly morphologies for different concentrations of ferrous ions and poly-A. A36 represents poly-A ssDNA with 36 adenine nucleotides. (scale bar: 500nm)

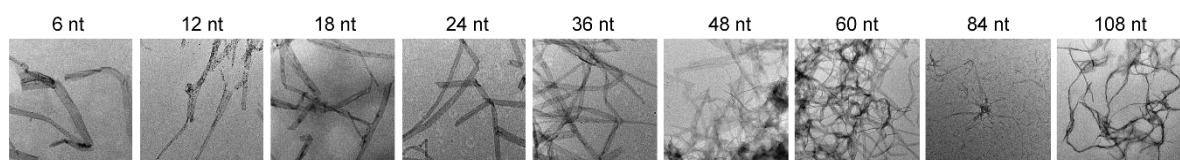

**Supplementary Fig. 6.** The nano morphologies of different length poly-A. (scale bar: 200 nm)

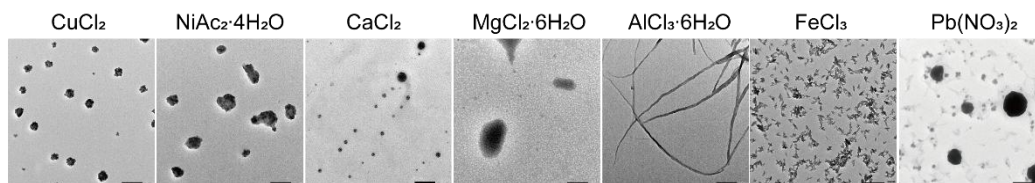

**Supplementary Fig. 7.** The assembly of poly-A ssDNA and various metal ions.

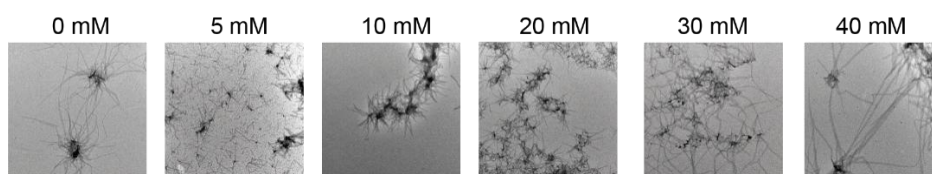

**Supplementary Fig. 8.** The TEM images of DNA-Fe<sup>2+</sup> complex under different concentration of Mg<sup>2+</sup>.

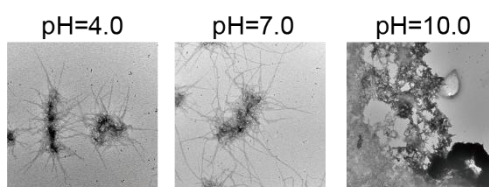

**Supplementary Fig. 9.** The TEM images of DNA-Fe<sup>2+</sup> complex formed in different pH. (scale bar: 500 nm)

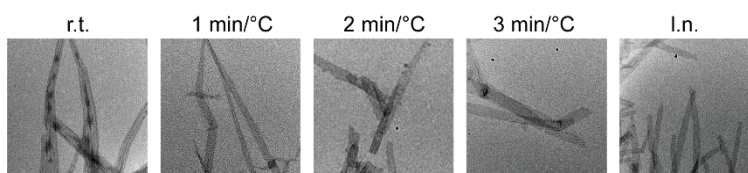

**Supplementary Fig. 10.** Morphologies under different cooling processes. **r.t.** represent cooling in room temperature; **l.n.** represent fast cooling in liquid nitrogen; other labels are the cooling from 95 °C to 25 °C. (scale bar: 200nm)

| Poly-A 80 μM     |                  |                    |
|------------------|------------------|--------------------|
| Fe <sup>2+</sup> | 1 mM             | 2 mM               |
|                  |                  |                    |
|                  | small & sporadic | large & aggregated |

**Supplementary Fig. 11.** Representative TEM images of nanospheres at different concentrations of

Fe<sup>2+</sup> (scalebar: 1 μm).

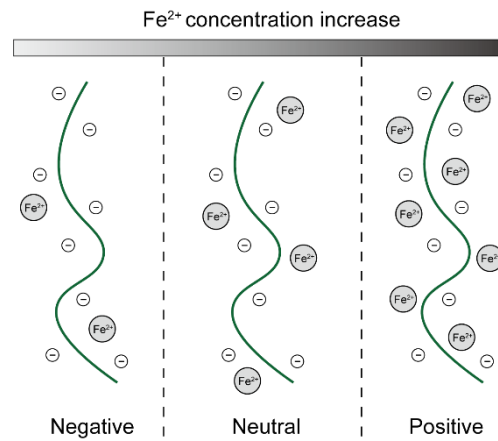

**Supplementary Fig. 12.** Scheme illustrates the ions adsorption onto DNA under different conditions.

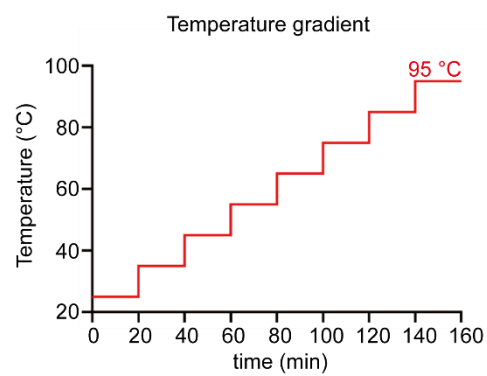

**Supplementary Fig. 13.** Temperature-time curve during gradient heating. (25-95 °C, 10 min/ 10°C)

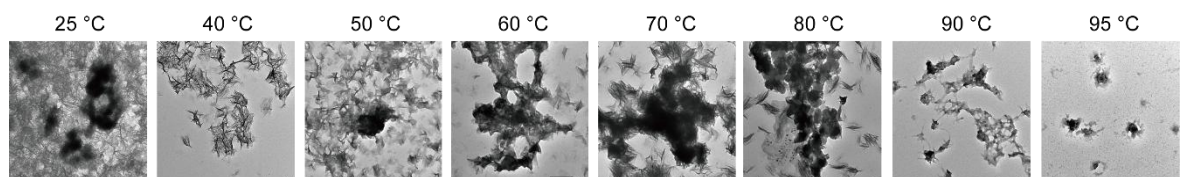

**Supplementary Fig. 14.** The morphologies evolution of DNA under gradient heating. (scale bar: 200 nm)

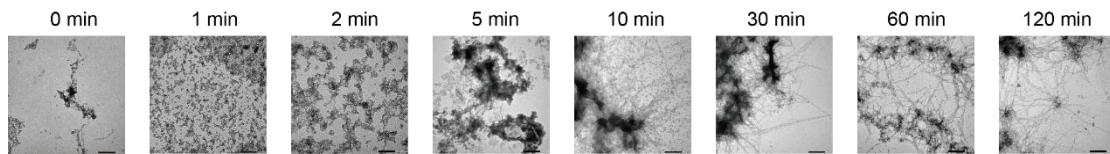

**Supplementary Fig. 15.** The morphology evolution of DNA-Fe<sup>2+</sup> complex under different durations of heating treatment. (scale bar: 500 nm)

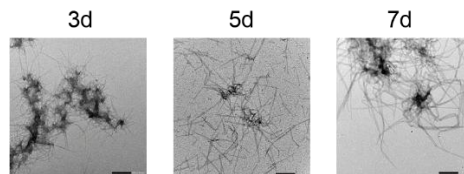

**Supplementary Fig. 16.** The TEM images of DNA-Fe<sup>2+</sup> complex after 3, 5, and 7 days. (scale bar: 500 nm)

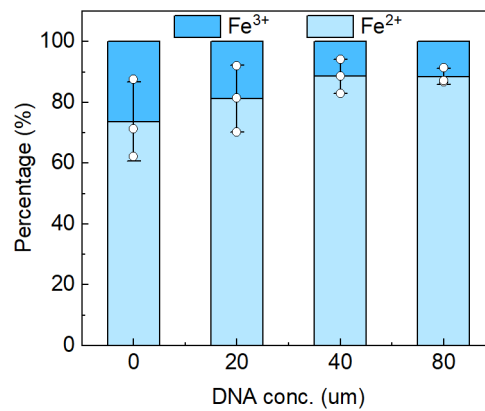

**Supplementary Fig. 17.** The percentage of Fe<sup>2+</sup> and Fe<sup>3+</sup> in Fe-DNA complex. (n=3)

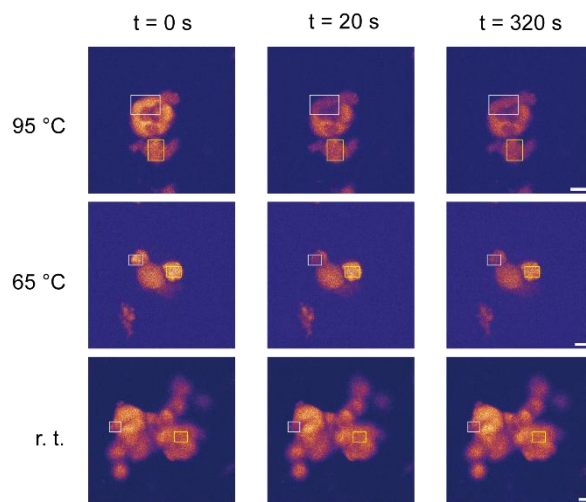

**Supplementary Fig. 18.** The complete fluorescent images of fluorescence recovery after photobleaching (FRAP) assay. (scale bar: 5  $\mu\text{m}$ )

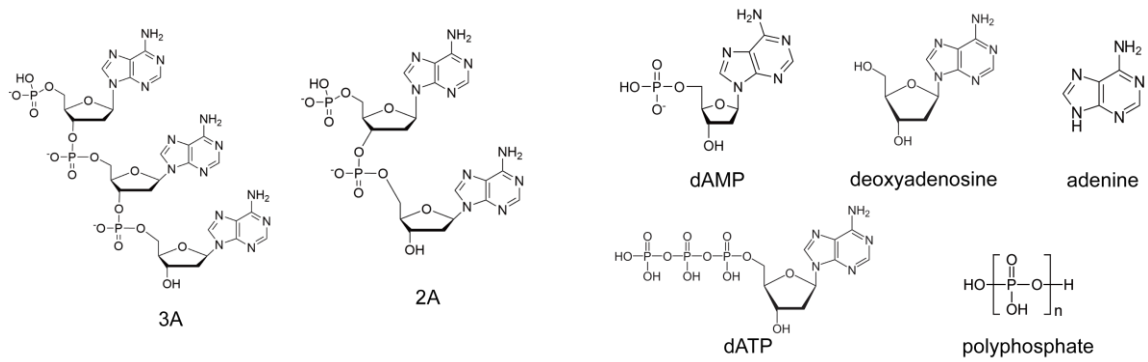

**Supplementary Fig. 19.** Chemical structure of additional molecules used for self-assembly.

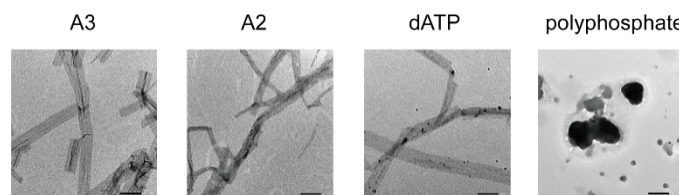

**Supplementary Fig. 20.** TEM images of additional molecules used for self-assembly. (scale bar: 200nm)

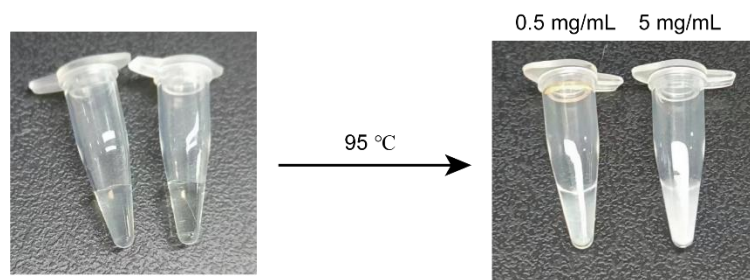

**Supplementary Fig. 21.** Polyphosphate-Fe<sup>2+</sup> mixture before and after heating treatment.

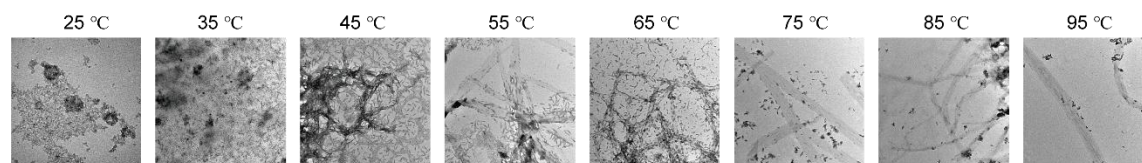

**Supplementary Fig. 22.** The transformation of adenine-Fe<sup>2+</sup> clusters under gradient heating. (scale bar: 200 nm)

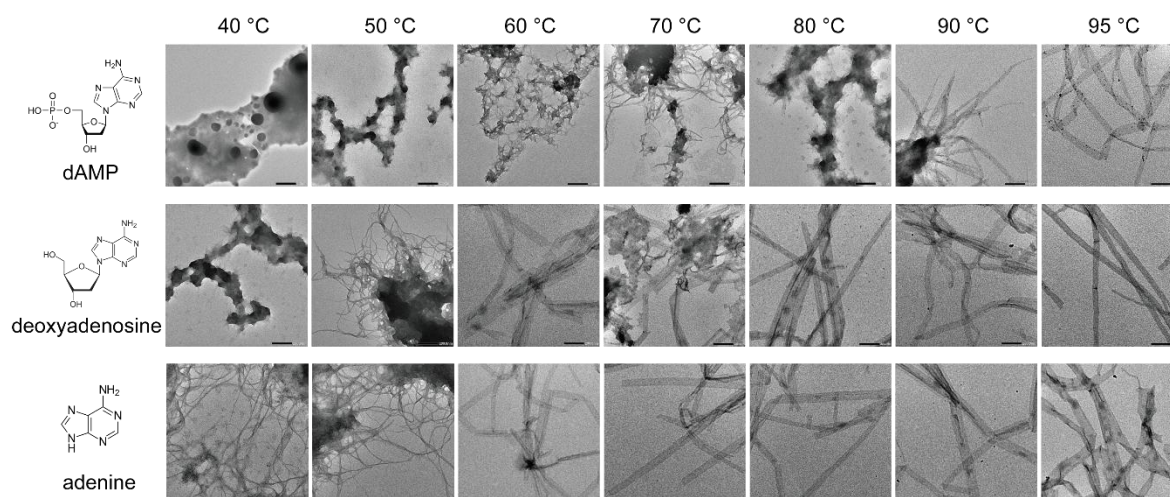

**Supplementary Fig. 23.** Nano morphologies of different molecules (dAMP, deoxyadenosine, adenine) under different temperatures (40-95 °C). (scale bar: 200nm)

|                 | urea                                                                              | formamide                                                                         | DMSO                                                                               | EDTA                                                                                |
|-----------------|-----------------------------------------------------------------------------------|-----------------------------------------------------------------------------------|------------------------------------------------------------------------------------|-------------------------------------------------------------------------------------|
| Pre-incubation  | 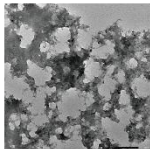 |  |  |  |
| Post-incubation | NA                                                                                |  | NA                                                                                 |  |

**Supplementary Fig. 24.** The TEM images show the morphology of DNA-Fe<sup>2+</sup> complex after incubation with various competitive reagents. (scale bar: 200 nm) NA, not available: represent the morphology cannot be characterized in such TEM method.

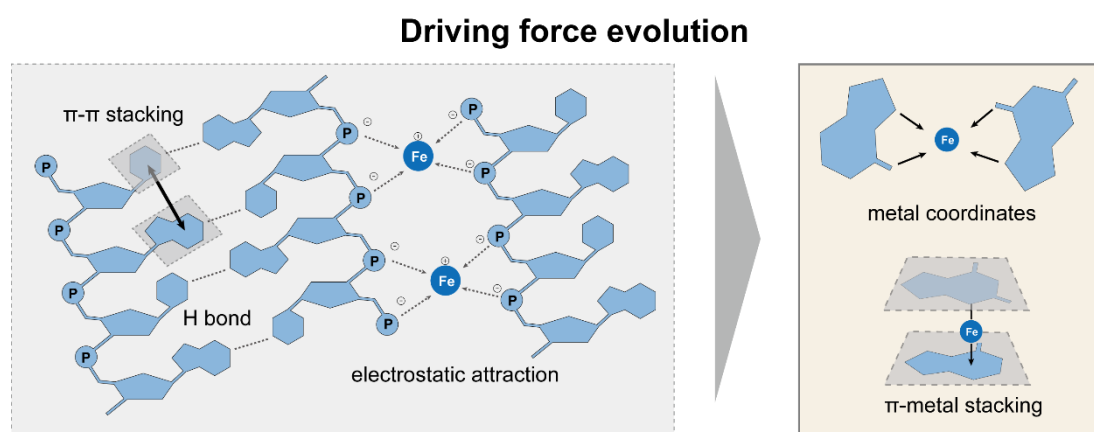

**Supplementary Fig. 25.** The illustration shows the driving force evolution under heating.
